# Supplementary material
Source: publisher figshare collection journal article supplement (https://sage.figshare.com/ndownloader/files/15287480)
Supplement: Supplementary file 1 [file 15287480]

## Appendix

### Notation

|               |                                                                                                                                          |
|---------------|------------------------------------------------------------------------------------------------------------------------------------------|
| $m$           | : Amount of the waste component coming to a transfer station from source.                                                                |
| $\sigma_{FR}$ | : Amount of the organic waste component coming to an aerobic biological treatment plant from source after separate collection at source. |
| $\beta_{FR}$  | : Amount of the organic waste component coming to a small thermal process source after separate collection at source.                    |
| $\gamma_{FR}$ | : Amount of the organic waste component coming to a big thermal process source after separate collection at source.                      |
| $F$           | : Transfer station.                                                                                                                      |
| $\lambda_F$   | : Amount of the waste component coming to a separator from a transfer station.                                                           |
| $\beta_F$     | : Amount of the waste component coming to a small thermal process from a transfer station.                                               |
| $\gamma_F$    | : Amount of the waste component coming to a big thermal process from a transfer station.                                                 |
| $\delta_F$    | : Amount of the waste component coming to a landfill from a transfer station.                                                            |
| $S$           | : Separator.                                                                                                                             |
| $\sigma_S$    | : Amount of the waste component coming to an aerobic biological treatment plant from a separator.                                        |
| $\beta_S$     | : Amount of the waste component coming to a small thermal process plant from a separator.                                                |
| $\gamma_S$    | : Amount of the waste component coming to a big thermal process plant from a separator.                                                  |
| $\delta_S$    | : Amount of the waste component coming to a landfill from a separator.                                                                   |
| $K$           | : Aerobic biological treatment plant.                                                                                                    |
| $K1, K2$      | : Divided process part of an aerobic biological treatment plant.                                                                         |
| $\delta_{K1}$ | : Amount of the waste component coming to a landfill from K1.                                                                            |
| $\delta_{K2}$ | : Amount of the waste component coming to a landfill from K2.                                                                            |
| $T$           | : Small thermal process.                                                                                                                 |
| $T1, T2, T3$  | : Divided process part of a small thermal process.                                                                                       |
| $\delta_{T1}$ | : Amount of the waste component coming to a landfill from T1.                                                                            |
| $\delta_{T2}$ | : Amount of the waste component coming to a landfill from T2.                                                                            |
| $\delta_{T3}$ | : Amount of the waste component coming to a landfill from T3.                                                                            |
| $BT$          | : Big thermal process.                                                                                                                   |

BT1, BT2, BT3: Divided process part of a big thermal process.

$\delta_{BT1}$  : Amount of the waste component coming to a landfill from BT1.

$\delta_{BT2}$  : Amount of the waste component coming to a landfill from BT2.

$\delta_{BT3}$  : Amount of the waste component coming to a landfill from BT3.
